# Supplementary material for: Epigallocatechin-3-gallate improves cardiac hypertrophy and short-term memory deficits in a Williams-Beuren syndrome mouse model
Source: PubMed Central journal article supplement (PMC5858783; doi:10.1371/journal.pone.0194476), 2018-03-19
Supplement: pone.0194476.s005.pdf [file pone.0194476.s005.pdf]

**Supplementary table 1. Primer sequences used in qPCR/semiquantitative PCR**

| Gene           |   | Sequence (5' → 3')      | Size | Location | T <sub>m</sub> (°C) |
|----------------|---|-------------------------|------|----------|---------------------|
| <i>Bdnf</i>    | L | AGTCTCCAGGACAGCAAAGC    | 189  | exon 1   | 63.6                |
|                | R | ATTCACGCTCTCCAGAGTCC    |      | exon 2   | 63.4                |
| <i>Pik3r1</i>  | L | TGGCTGGGGAATGAAAATAC    | 179  | exon 8   | 63.5                |
|                | R | CAGCCCTGCTTACTGTCTC     |      | exon 9   | 64.2                |
| <i>Ncf1</i>    | L | ATACTTCAACGGCCTCATGG    | 233  | exon 4   | 59.96               |
|                | R | CTGTTCCCGAACTCTTCTCG    |      | exon 6   | 59.98               |
| <i>Ncf2</i>    | L | CCGACAAGAAGGACTGGAAG    | 219  | exon 1   | 59.84               |
|                | R | CAAGGTCGTA CTCTCCATTCTG |      | exon 2-3 | 60.17               |
| <i>Rac2</i>    | L | AACGCCTTCCCTGGAGAATA    | 150  | exon 2   | 60.95               |
|                | R | TGTCTGTGGGTAGGAGAGTGG   |      | exon 3   | 60.16               |
| <i>Cyba</i>    | L | AGATCGAGTGGGCCATGT      | 102  | exon 1   | 59                  |
|                | R | ACCACTGTGTGAAACGTCCA    |      | exon 2   | 60                  |
| <i>Nos3</i>    | L | TCCTGTGCATGGATGAGTATG   | 157  | exon 13  | 63.6                |
|                | R | CTAGGGGAGCTGTTGTACGG    |      | exon 14  | 63.5                |
| <i>Hsp90</i>   | L | GGAGGAGAGCAAGGCAAAGT    | 161  | exon 9   | 64.7                |
|                | R | TCATGATCCGTTCCATGTTG    |      | exon 10  | 64.5                |
| <i>Cav1</i>    | L | GCAGACGAGGTGACTGAGAA    | 184  | exon 3   | 63.6                |
|                | R | CAGTGAAGGTGGTGAAGCTG    |      | exon 4   | 63.6                |
| <i>Cacna1c</i> | L | CAGGAAGATGAACACCGACA    | 164  | exon 44  | 63.8                |
|                | R | TGAGAGATGTCTCCCCCTTG    |      | exon 45  | 64.3                |
| <i>Atp2a2</i>  | L | TTCCGTTACCTGGCTATTGG    | 153  | exon 16  | 63.6                |
|                | R | TCCATCGAAGTCTGGGTGT     |      | exon 18  | 64.5                |
| <i>Nqo1</i>    | L | GGCTGGTTTGAGAGAGTGCT    | 180  | exon 4   | 63.6                |
|                | R | ACTCTGAATCGGCCAGAGAA    |      | exon 6   | 63.9                |
| <i>Limk1</i>   | L | CCTACCTCCATTGATGAACA    | 262  | exon 12  | 63.81               |
|                | R | CCAAAGGAAAACACGTCCA     |      | exon 14  | 64.35               |
| <i>Rps28</i>   | L | TAGGGTAACCAAAGTCTGGG    | 103  | exon 1-2 | 67.9                |
|                | R | GACATTTCCGGATGATAGACGG  |      | exon 3   | 66.6                |
